# Supplementary material for: Phosphoserine for the generation of lanthanide binding sites onproteins for paramagnetic NMR
Source: Copernicus journal article supplement (doi:10.5194/mr-2020-26), 2020-11-04
Supplement: Supplementary file 1 [file mr-2020-26-supplement.pdf]

## Supporting Information

### Phosphoserine for the generation of lanthanide binding sites on proteins for paramagnetic NMR

Sreelakshmi Mekkattu Tharayil, Mithun C. Mahawaththa, Choy-Theng Loh, Ibdolapo Adekoya, Gottfried Otting

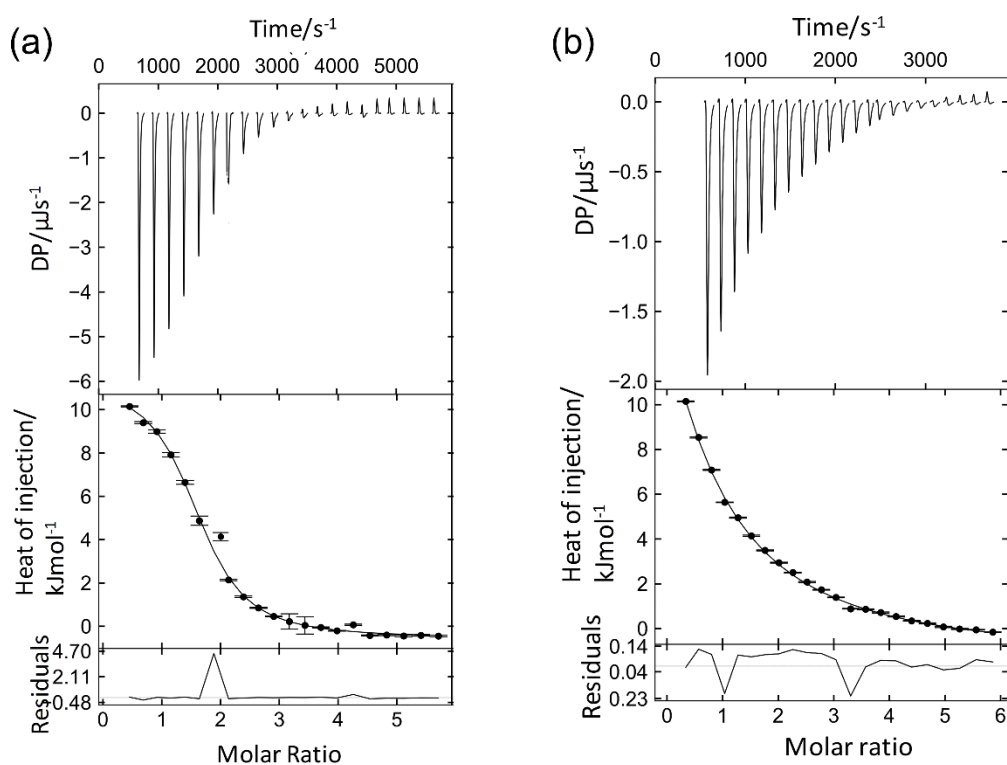

**Figure S1.** Isothermal titration calorimetry experiments of ubiquitin E18Sep titrated with  $\text{TbCl}_3$ . (a) Cell =  $150 \mu\text{M}$  ubiquitin E18Sep; syringe =  $2.7 \text{ mM}$   $\text{TbCl}_3$ . (b) Cell =  $150 \mu\text{M}$  ubiquitin E18Sep; syringe =  $2.7 \text{ mM}$   $\text{TmCl}_3$ . The top panel shows the baseline-corrected power traces. The middle panel displays the heat data and best fit. The bottom panel shows the residual of the fit. Error bars calculated by the program NITPIC (Keller et al., 2015) indicate the standard error in the integration of the peaks. DP denotes the power differential between the reference and sample cells to maintain a zero temperature difference between the cells.

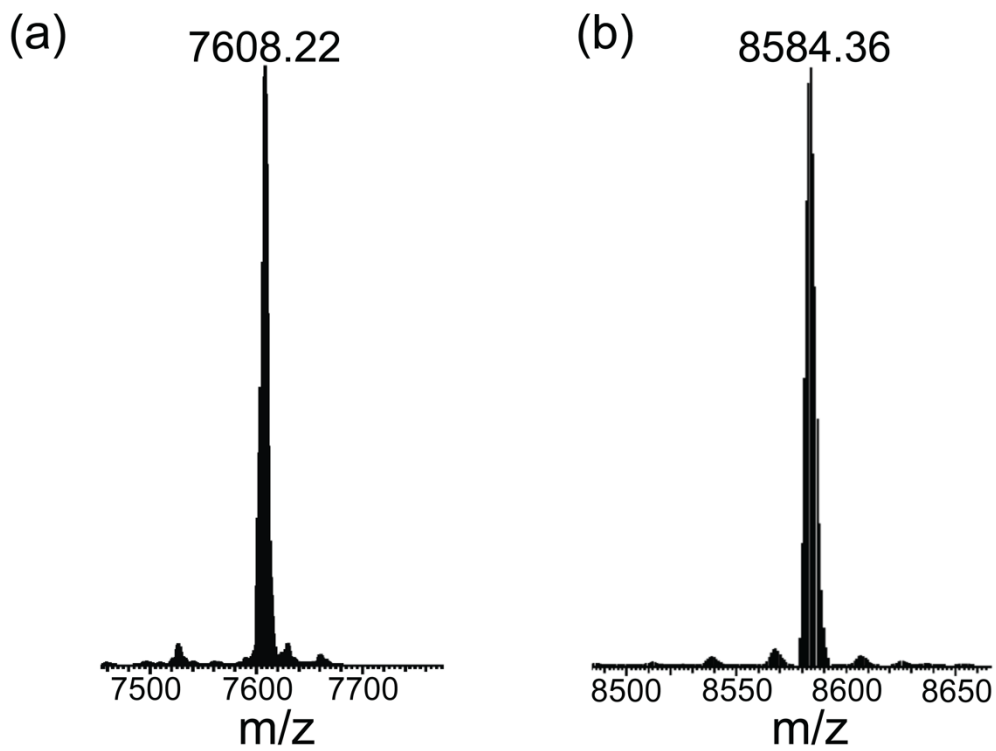

**Figure S2.** Mass spectra of intact GB1 protein with two Sep residues, confirming the double amber suppression. (a) GB1 K10Sep/T11Sep after cleavage of the His<sub>6</sub>-tag with TEV protease. The expected mass is 7610 Da. (a) GB1A24Sep/K28Sep before cleavage of the His<sub>6</sub>-tag. High purity of the protein was achieved already by a single affinity chromatography step using Ni-NTA. The expected mass is 8584.69 Da.

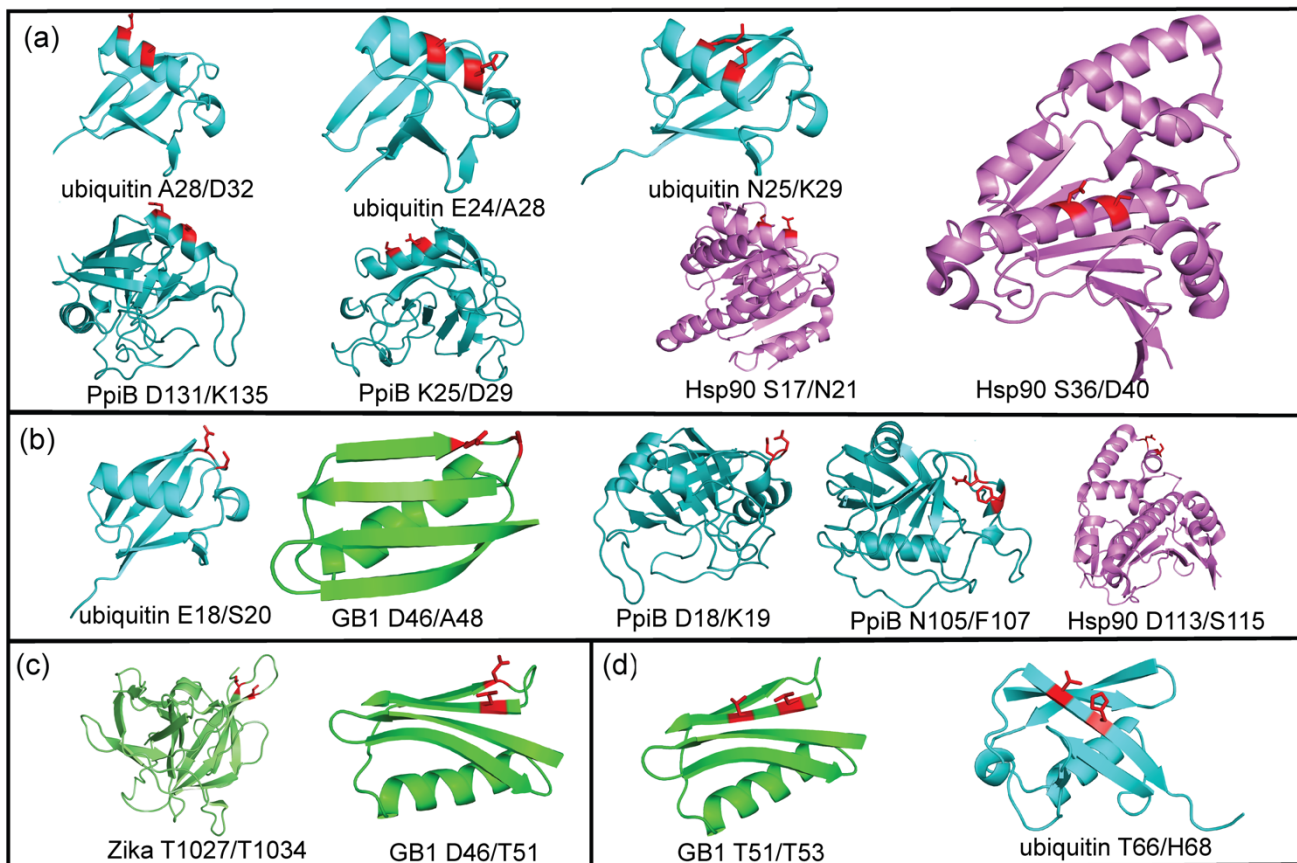

**Figure S3.** Double-amber mutants tested for expression with phosphoserine. Mutation sites are highlighted in red, showing the side chains of the wild-type protein in stick representation. Ubiquitin is abbreviated Ubi. The Zika virus NS2B-NS3 protease is denoted Zika. (a) Targeted sites in positions  $i$  and  $i+4$  of an  $\alpha$ -helix. (b) Targeted sites in positions  $i$  and  $i+2$  of a loop region. (c) Targeted sites located in two neighbouring  $\beta$ -strands. (d) Targeted sites in positions  $i$  and  $i+2$  of a  $\beta$ -strand.

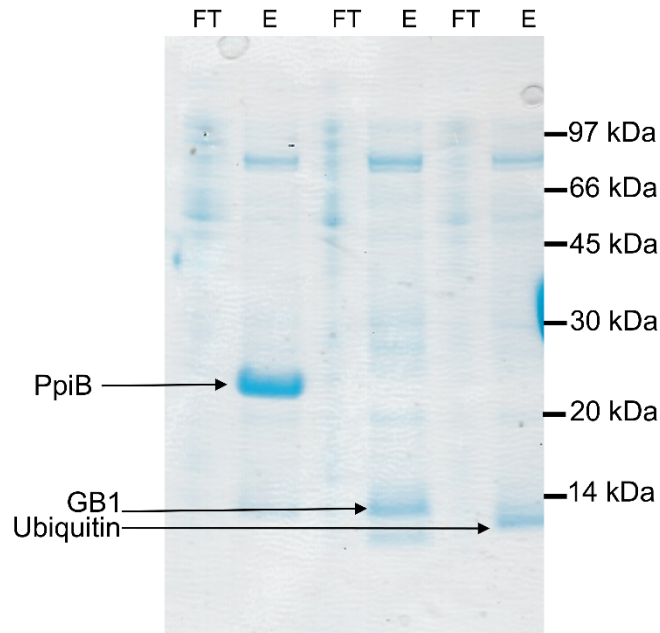

**Figure S4.** SDS-PAGE gel illustrating the successful production and Ni-NTA column purification of PpiB K25BoK/D29BoK, GB1 T51BoK/T53BoK and ubiquitin A28BoK/D32BoK, where BoK stands for Boc-lysine. The lanes labelled FT and E are of the flow-through and elution fractions, respectively. Arrows identify the bands of the full-length proteins.

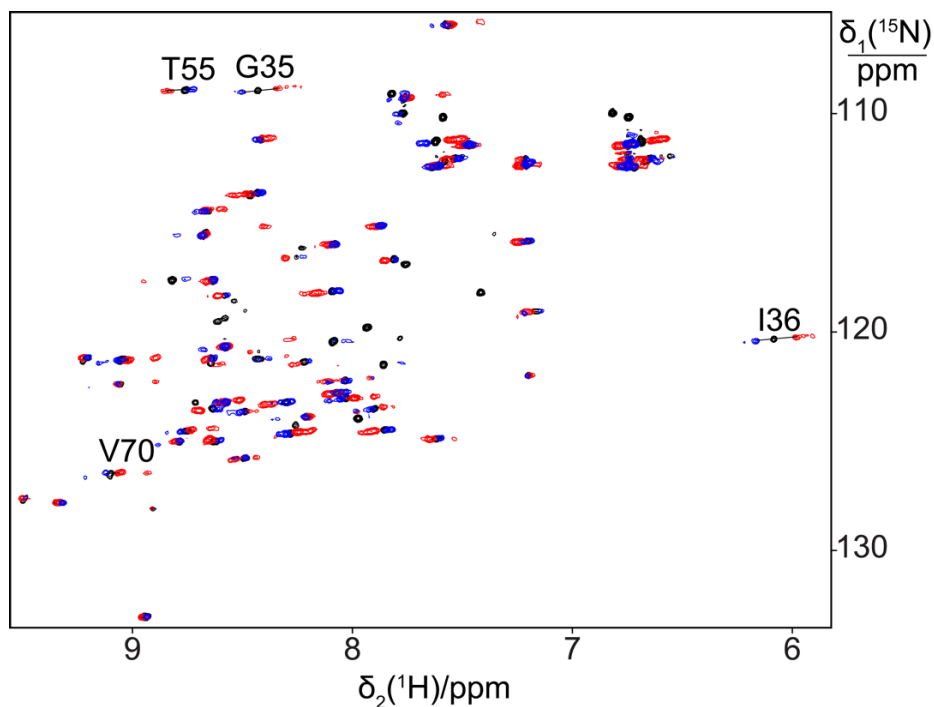

**Figure S5.** Small PCSs generated by lanthanides in the ubiquitin Q2D/E64Sep mutant indicate the absence of a well-defined lanthanide binding site. The figure shows a superimposition of  $[\text{}^{15}\text{N}, \text{}^1\text{H}]$ -HSQC spectra of 0.3 mM solutions of ubiquitin Q2D/E64Sep recorded in the presence of  $\text{Tb}^{3+}$  (red),  $\text{Tm}^{3+}$  (blue) or  $\text{Y}^{3+}$  (black).

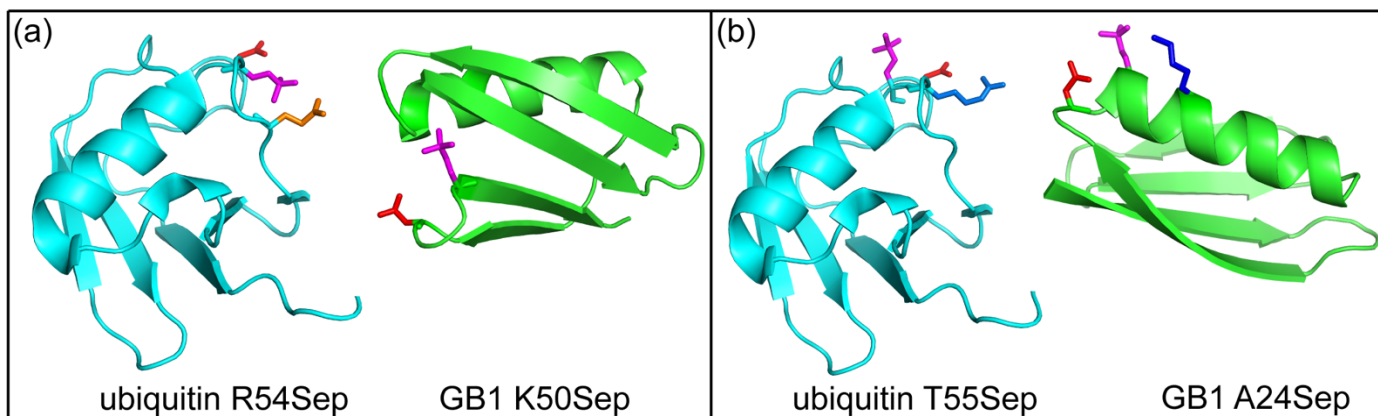

**Figure S6.** Single-phosphoserine mutants of ubiquitin and GB1, which either did not express or expressed but did not produce PCSs upon titration with lanthanide ions. The side chains of selected residues are highlighted, with phosphoserine in magenta, aspartate in red, glutamate in orange and lysine residues in blue. (a) Mutants that failed to express. In the ubiquitin mutant R54Sep, D58 and E51 are near the Sep residue in position 54. In the GB1 mutant K50Sep, D7 is near the Sep residue in position 50. (b) Mutants that did not produce PCSs upon titration with lanthanide ions. In the ubiquitin mutant T55Sep, R54 can form a salt bridge with D58 or Sep55. In the GB1 mutant A24Sep, K28 can form a salt bridge with the Sep residue in position 24, while D22 does not have a salt bridge partner.

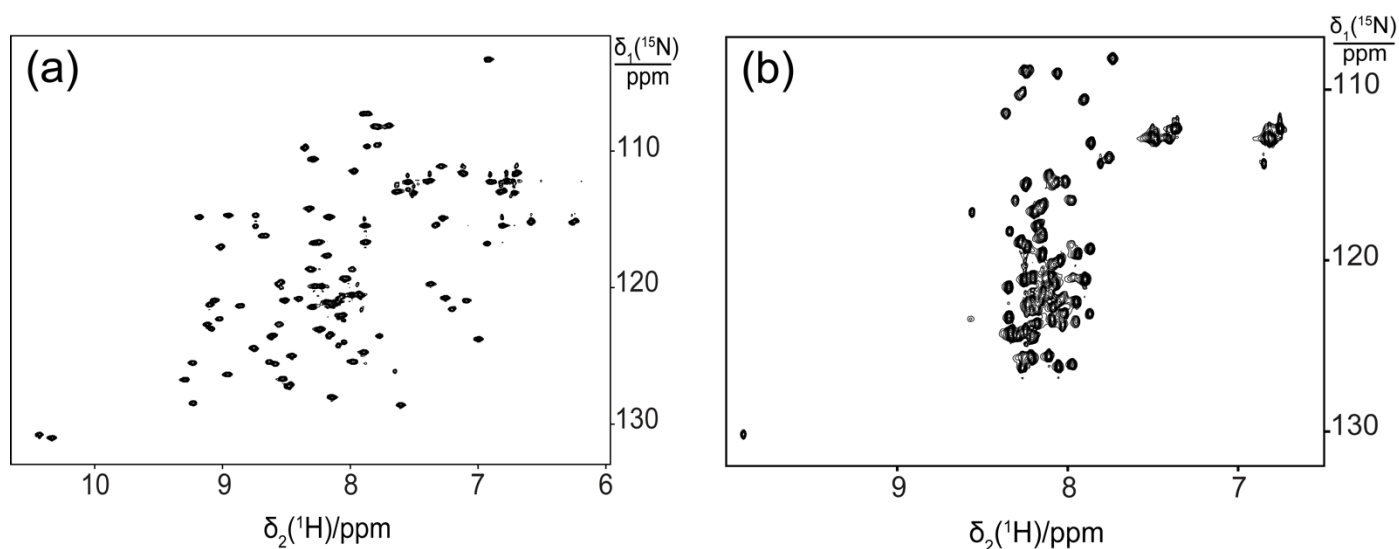

**Figure S7.** The introduction of negatively charged residues in close proximity can lead to protein unfolding. The figure shows  $[^{15}\text{N}, ^1\text{H}]$ -HSQC spectra of 0.3 mM solutions of (a) wild-type GB1 and (b) GB1 K4D/I6Sep in 20 mM HEPES-KOH, pH 7.0. The spectrum was recorded at a  $^1\text{H}$ -NMR frequency of 800 MHz.

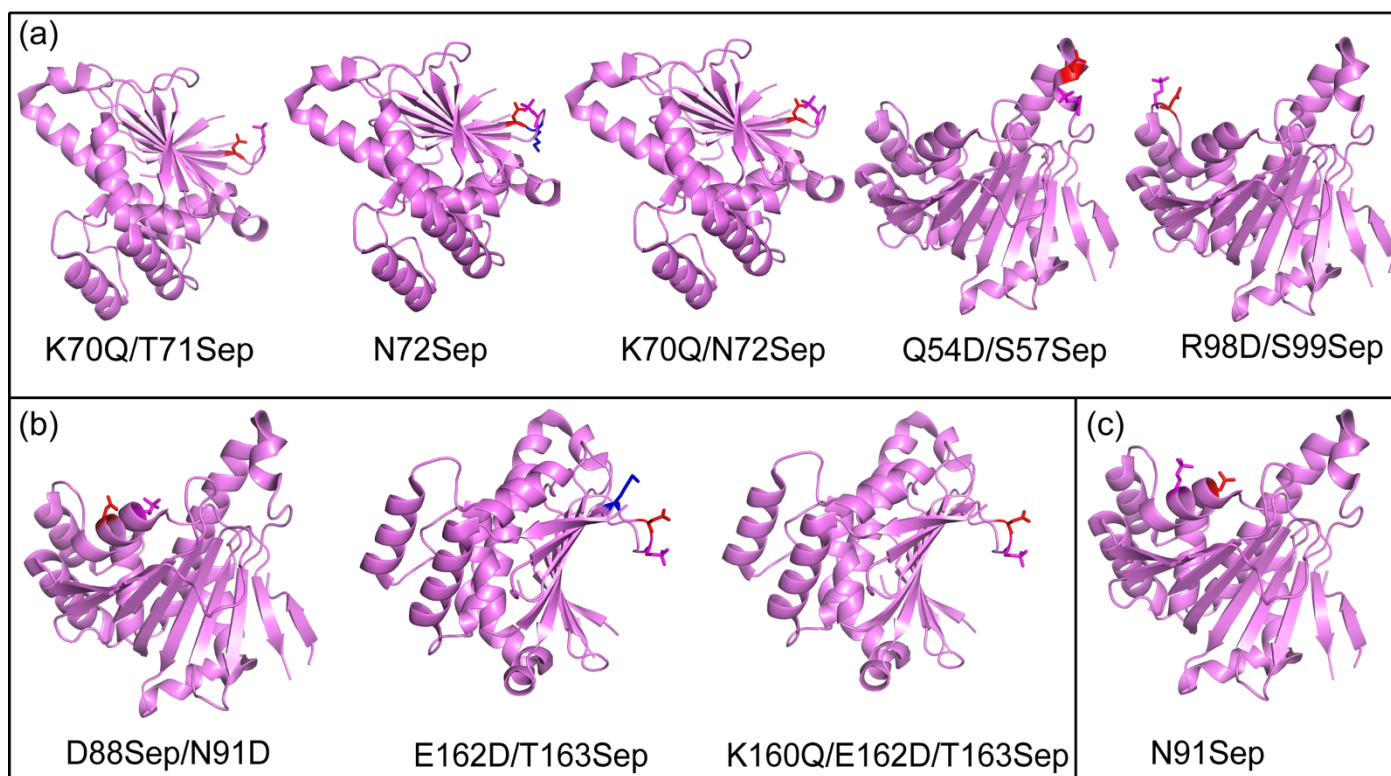

**Figure S8.** Single-phosphoserine mutants of *Pf* Hsp90-N tested for expression with phosphoserine. The side chains of selected residues are highlighted as in Figure S7. (a) Mutants that failed to express. (b) Mutants that were produced only in yields too low for NMR spectroscopy. (c) Mutant that expressed in sufficient yield for isotope labelling. The Sep residue in position 91 was expected to form a lanthanide binding site together with D88 (highlighted in red). The residues targeted for mutation sites were chosen by their sidechains pointing in the same direction and the absence of positively charged residues nearby with the potential for making a salt-bridge with either the aspartate or phosphoserine residue in the mutant protein.

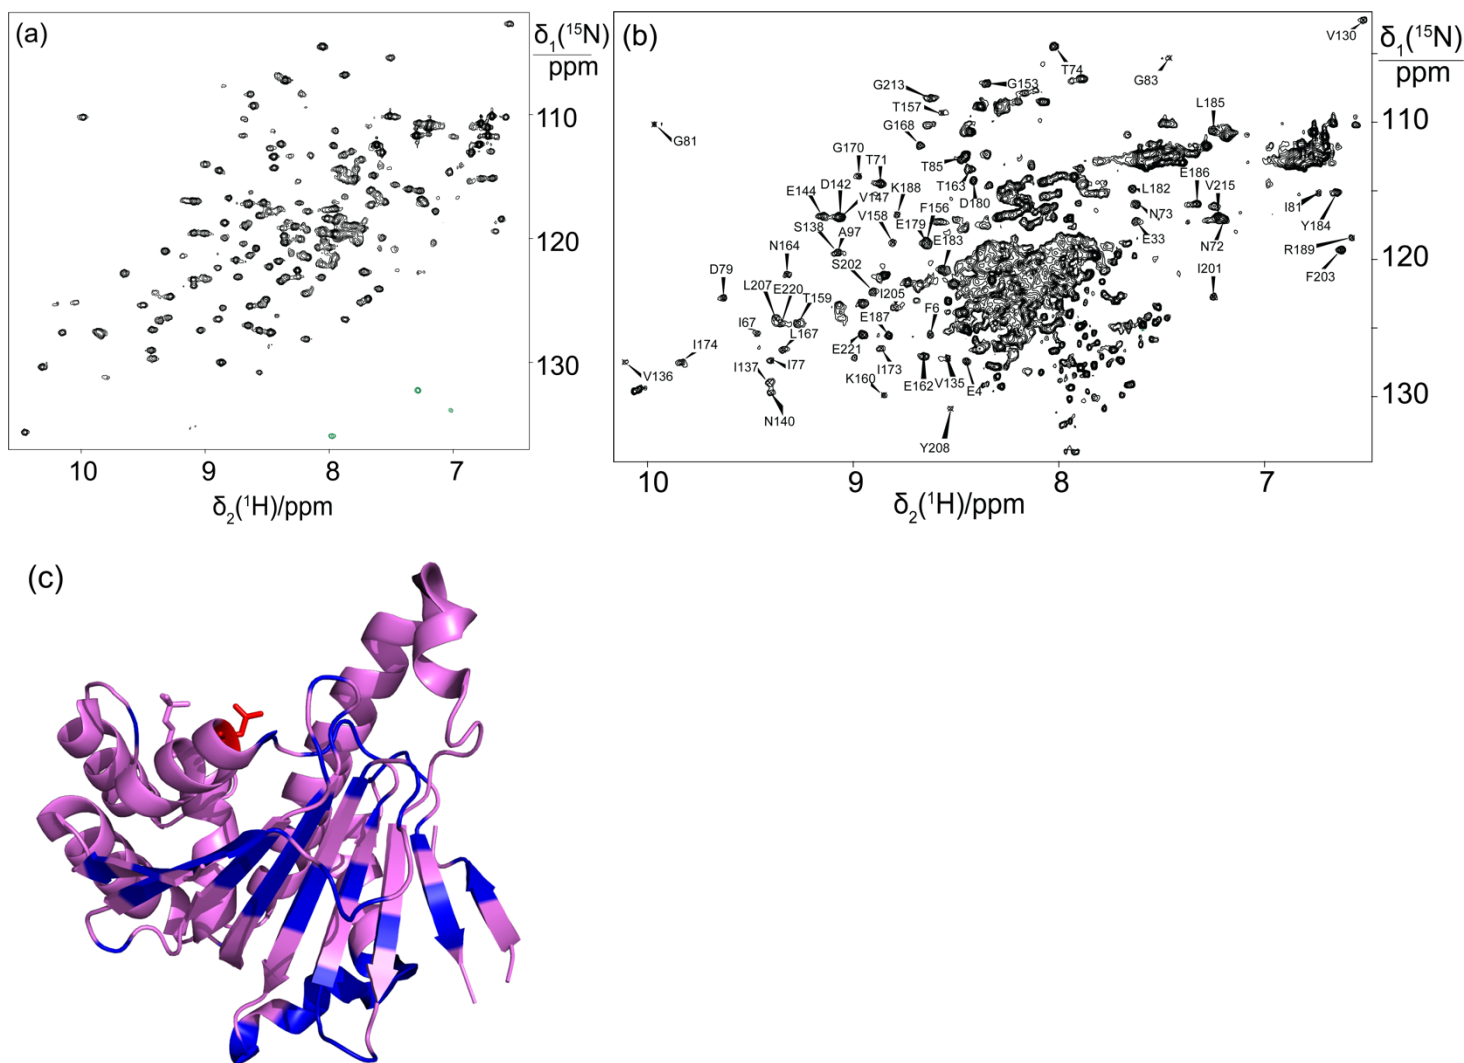

**Figure S9.** Partial unfolding of the *PfHsp90-N* N91Sep mutant evidenced by NMR spectroscopy. (a) [ $^{15}\text{N}$ ,  $^1\text{H}$ ]-HSQC spectrum of a 290  $\mu\text{M}$  solution of  $^{15}\text{N}$ -labelled wild-type *PfHsp90-N* in 20 mM MES-KOH, pH 6.5, 100 mM NaCl and 1 mM DTT. The spectrum was recorded at a  $^1\text{H}$  NMR frequency of 600 MHz. (b) Same as (a), but of a 280  $\mu\text{M}$  solution of the mutant N91Sep. Cross-peaks conserved between the spectra of the wild-type and mutant proteins are identified. (c) Ribbon representation of the crystal structure of *PfHsp90-N* (PDB ID 3K60; Corbett and Berger, 2010). Highlighted in blue are the amino-acid residues with conserved chemical shifts in the mutant and wild-type samples. The side chains of D88 and the Sep residue in position 91 are coloured red and magenta, respectively.



**Table S1** PCSs of backbone amide protons measured with TbCl<sub>3</sub> and TmCl<sub>3</sub> in different ubiquitin mutants<sup>a</sup>

| ubiquitin E18Sep     |          |                      |          | ubiquitin E16Q/E18Sep |          |                      |          | ubiquitin T22Sep/N25D/K29Q |          |
|----------------------|----------|----------------------|----------|-----------------------|----------|----------------------|----------|----------------------------|----------|
| Tb <sup>3+</sup>     |          | Tm <sup>3+</sup>     |          | Tb <sup>3+</sup>      |          | Tm <sup>3+</sup>     |          | Tb <sup>3+</sup>           |          |
| Residue <sup>b</sup> | PCS /ppm | Residue <sup>b</sup> | PCS /ppm | Residue <sup>b</sup>  | PCS /ppm | Residue <sup>b</sup> | PCS /ppm | Residue <sup>b</sup>       | PCS /ppm |
| Lys6                 | -0.452   | Val5                 | 0.160    | Phe4                  | -0.326   | Phe4                 | 0.229    | Phe4                       | -0.116   |
| Thr9                 | -0.253   | Lys6                 | 0.099    | Lys6                  | -0.424   | Val5                 | 0.318    | Lys6                       | -0.153   |
| Lys11                | -0.287   | Thr7                 | 0.077    | Thr7                  | -0.363   | Lys6                 | 0.193    | Thr7                       | -0.125   |
| Thr12                | -0.363   | Leu8                 | 0.058    | Thr9                  | -0.241   | Thr7                 | 0.149    | Leu8                       | -0.076   |
| Ile13                | -0.625   | Thr9                 | 0.051    | Lys11                 | -0.277   | Leu8                 | 0.110    | Thr9                       | -0.049   |
| Glu34                | -0.623   | Lys11                | 0.058    | Thr12                 | -0.349   | Thr9                 | 0.101    | Lys11                      | -0.086   |
| Gly35                | -0.437   | Thr12                | 0.073    | Ile13                 | -0.567   | Lys11                | 0.119    | Thr12                      | -0.126   |
| Ile36                | -0.380   | Ile13                | 0.125    | Gly35                 | -0.218   | Thr12                | 0.145    | Ile13                      | -0.224   |
| Gln40                | -0.235   | Gly35                | 0.072    | Ile36                 | -0.361   | Ile13                | 0.247    | Glu34                      | -0.292   |
| Gln41                | -0.389   | Ile36                | 0.068    | Gln40                 | -0.186   | Glu34                | 0.260    | Gly35                      | -0.173   |
| Ile44                | -0.399   | Gln41                | 0.059    | Gln41                 | -0.334   | Gly35                | 0.173    | Ile36                      | -0.095   |
| Phe45                | -0.247   | Leu43                | 0.088    | Ile44                 | -0.379   | Ile36                | 0.155    | Gln41                      | 0.144    |
| Ala46                | -0.071   | Ile44                | 0.084    | Ala46                 | -0.080   | Gln40                | 0.085    | Leu43                      | -0.031   |
| Gly47                | -0.069   | Phe45                | 0.053    | Gly47                 | -0.084   | Gln41                | 0.127    | Ile44                      | -0.076   |
| Lys48                | -0.136   | Ala46                | 0.033    | Lys48                 | -0.142   | Ile44                | 0.171    | Phe45                      | -0.124   |
| Asn60                | 0.633    | Gly47                | 0.029    | Leu50                 | -0.384   | Ala46                | 0.065    | Ala46                      | -0.083   |
| Gln62                | 0.974    | Lys 48               | 0.032    | Tyr59                 | -0.044   | Gly47                | 0.064    | Leu50                      | -0.064   |
| Glu64                | 0.631    | Leu50                | 0.071    | Asn60                 | 0.422    | Lys48                | 0.067    | Tyr59                      | -0.213   |
| His68                | -0.358   | Asp52                | 0.063    | Ile61                 | 0.760    | Leu50                | 0.138    | Ile61                      | 0.145    |
| Gly75                | -0.050   | Arg54                | 0.131    | Gln62                 | 0.870    | Tyr59                | -0.013   | Gln62                      | 0.190    |
|                      |          | Thr55                | 0.106    | Glu64                 | 0.726    | Asn60                | -0.122   | Glu64                      | 0.197    |
|                      |          | Tyr59                | -0.034   | Leu67                 | -0.42    | Ile61                | -0.147   | Ser65                      | 0.096    |
|                      |          | Asn60                | -0.091   | His68                 | -0.337   | Gln62                | -0.141   | Thr66                      | -0.013   |
|                      |          | Ile61                | -0.094   | Val70                 | -0.335   | Glu64                | -0.078   | Leu67                      | -0.170   |
|                      |          | Gln62                | -0.082   | Arg74                 | -0.063   | Ser65                | -0.013   | His68                      | -0.138   |
|                      |          | His68                | 0.083    | Phe4                  | -0.326   | Leu67                | 0.217    | Gly76                      | 0.054    |
|                      |          | Gly75                | 0.013    | Lys6                  | -0.424   | His68                | 0.165    |                            |          |
|                      |          |                      |          |                       |          | Val70                | 0.142    |                            |          |

<sup>a</sup> Data recorded at 25 °C and pH 7.0.



**Table S2** PCSs of backbone amide protons generated with TbCl<sub>3</sub> and TmCl<sub>3</sub> in different GB1 mutants<sup>a</sup>

| GB1K10D/T11Sep       |                      | GB1A24Sep/K28Sep     |                         |                      |                         | GB1K10Sep/T11Sep     |                         |
|----------------------|----------------------|----------------------|-------------------------|----------------------|-------------------------|----------------------|-------------------------|
| Tb <sup>3+</sup>     |                      | Tb <sup>3+</sup>     |                         | Tm <sup>3+</sup>     |                         | Tb <sup>3+</sup>     |                         |
| Residue <sup>b</sup> | Residue <sup>b</sup> | Residue <sup>b</sup> | PCS <sup>exp</sup> /ppm | Residue <sup>b</sup> | PCS <sup>exp</sup> /ppm | Residue <sup>b</sup> | PCS <sup>exp</sup> /ppm |
| Thr2                 | -0.043               | Tyr3                 | -2.769                  | Tyr 3                | 1.181                   | Met1                 | -0.174                  |
| Lys4                 | -0.143               | Lys4                 | -2.685                  | Lys4                 | 1.223                   | Thr2                 | -0.235                  |
| Leu5                 | -0.230               | Ile6                 | -1.964                  | Ile6                 | 0.972                   | Tyr 3                | -0.353                  |
| Ile6                 | -0.507               | Leu7                 | -0.939                  | Leu7                 | 0.466                   | Lys4                 | -0.554                  |
| Glu15                | -0.219               | Asn8                 | -0.88                   | Gly9                 | 0.232                   | Leu5                 | -0.948                  |
| Thr17                | -0.069               | Gly9                 | -0.398                  | Lys10                | 0.127                   | Thr16                | -1.200                  |
| Thr18                | -0.057               | Lys10                | -0.158                  | Thr11                | 0.039                   | Thr17                | -0.597                  |
| Glu19                | -0.007               | Thr11                | -0.011                  | Leu12                | 0.056                   | Thr18                | -0.439                  |
| Ala20                | -0.015               | Leu12                | -0.053                  | Lys13                | 0.101                   | Glu19                | -0.240                  |
| Asp22                | -0.014               | Lys13                | -0.172                  | Gly14                | 0.266                   | Ala20                | -0.205                  |
| Ala26                | -0.020               | Gly14                | -0.504                  | Gly15                | 0.260                   | Val21                | -0.125                  |
| Glu27                | -0.030               | Glu15                | -0.538                  | Thr16                | 0.563                   | Asp22                | -0.141                  |
| Val29                | 0.097                | Thr16                | -1.187                  | Thr17                | 0.488                   | Ala23                | -0.151                  |
| Gln32                | 0.387                | Thr17                | -1.144                  | Tyr33                | -1.230                  | Ala24                | -0.118                  |
| Tyr45                | -0.554               | Glu19                | -2.346                  | Ala34                | -0.425                  | Ala26                | -0.193                  |
| Asp46                | -0.299               | Ala20                | -3.352                  | Asn35                | -1.241                  | Glu27                | -0.218                  |
| Asp47                | -0.162               | Tyr33                | 2.919                   | Asp36                | -1.329                  | Lys28                | -0.125                  |
| Thr49                | -0.147               | Ala34                | 1.304                   | Asn37                | -0.647                  | Val29                | -0.185                  |
| Lys50                | -0.140               | Asn35                | 3.086                   | Gly38                | -0.580                  | Phe30                | -0.356                  |
| Phe52                | -0.302               | Asp36                | 3.103                   | Gly41                | 0.483                   | Tyr32                | -0.097                  |
|                      |                      | Asn37                | 1.587                   | Glu42                | 0.682                   | Val39                | 0.204                   |
|                      |                      | Gly38                | 1.444                   | Trp43                | 1.561                   | Asp40                | 1.044                   |
|                      |                      | Val39                | 0.870                   | Tyr45                | 1.210                   | Tyr45                | -0.380                  |
|                      |                      | Gly41                | -0.748                  | Asp46                | 1.012                   | Asp46                | -0.484                  |
|                      |                      | Glu42                | -1.292                  | Ala48                | 0.204                   | Asp47                | -0.266                  |
|                      |                      | Trp43                | -2.998                  | Thr49                | 0.392                   | Ala48                | -0.266                  |
|                      |                      | Tyr45                | -2.103                  | Lys50                | 0.547                   | Thr49                | -0.339                  |
|                      |                      | Asp46                | -2.073                  | Phe52                | 1.526                   | Lys50                | -0.340                  |
|                      |                      | Ala48                | -0.280                  | Val54                | 0.894                   | Thr51                | -0.477                  |
|                      |                      | Thr49                | -0.839                  | Thr55                | 0.776                   | Phe52                | -0.808                  |
|                      |                      | Lys50                | -1.182                  | Glu56                | 0.357                   | Thr53                | -1.037                  |
|                      |                      | Val54                | -1.745                  |                      |                         |                      |                         |
|                      |                      | Thr55                | -1.457                  |                      |                         |                      |                         |
|                      |                      | Glu56                | -0.646                  |                      |                         |                      |                         |

<sup>a</sup> Data recorded at 25 °C and pH 7.0.

## References

Corbett, K. D. and Berger, J. M.: Structure of the ATP-binding domain of *Plasmodium falciparum* Hsp90, *Proteins*, 78, 2738–2744, <https://doi.org/10.1002/prot.22799>, 2010.

Keller, S., Vargas, C., Zhao, H., Piszczek, G., Brautigam, C. A., and Schuck, P.: High-precision isothermal titration calorimetry with automated peak-shape analysis, *Anal. Chem.*, 84, 5066–5073, <https://doi.org/10.1021/ac3007522>, 2012.
